# Supplementary material
Source: PubMed Central journal article supplement (PMC11072860)
Supplement: 18_2022_4424_MOESM1_ESM.pdf [file 18_2022_4424_MOESM1_ESM.pdf]

# Supplementary Figure 1

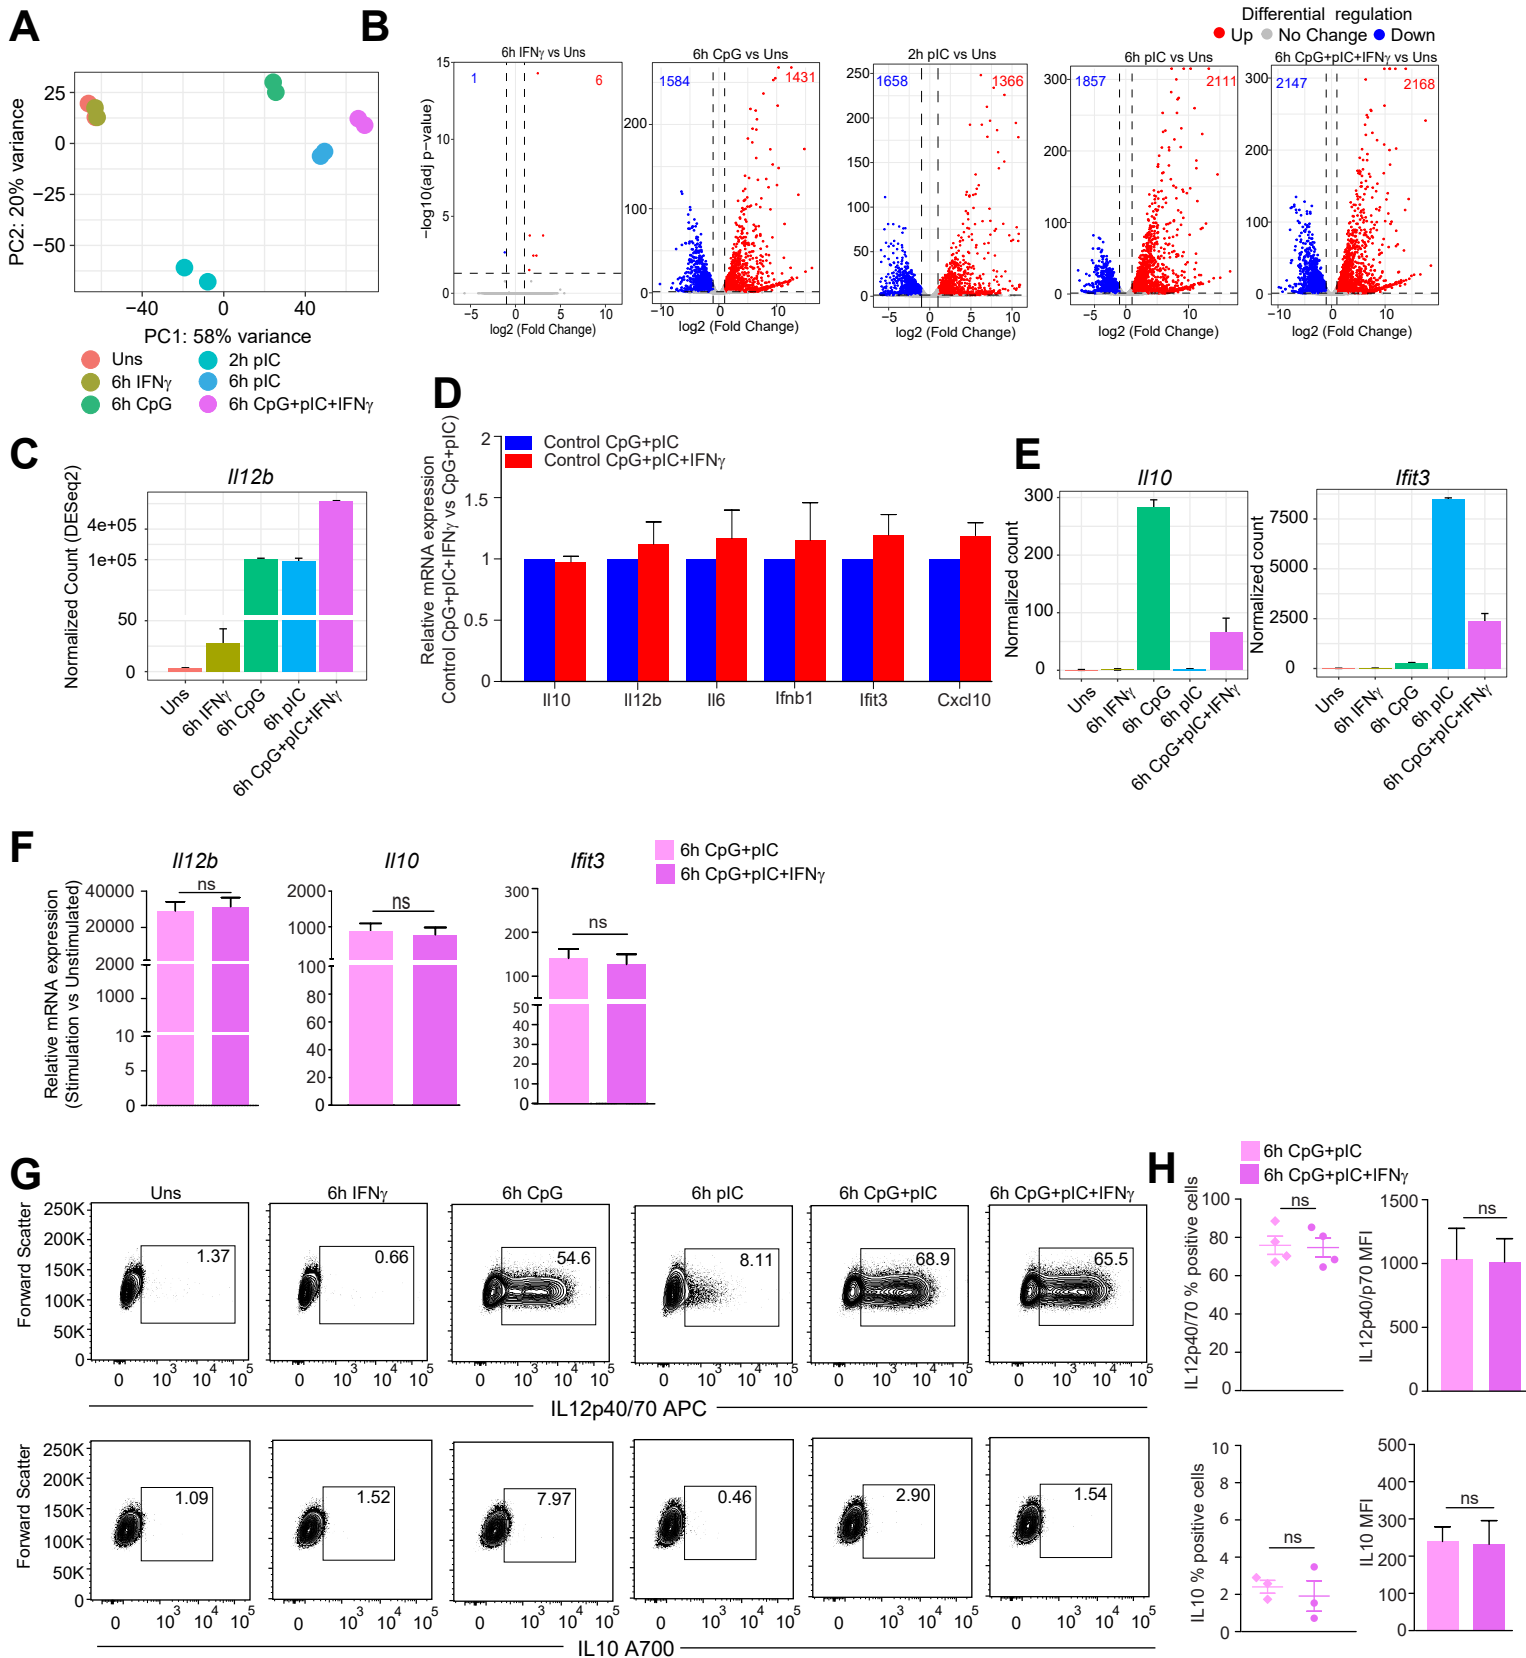

**Figure S1. RNA-seq analysis of unstimulated and TLR activated cDC1**

(A). PCA plot showing percent of variance explained by principal component 1 and 2 among unstimulated, IFN $\gamma$ , CpG, pIC and CpG+pIC+IFN $\gamma$  stimulation conditions in cDC1. (B). Volcano plot showing total number of differentially upregulated and downregulated genes at IFN $\gamma$ , CpG, pIC and CpG+pIC+IFN $\gamma$  activated DCs compared to unstimulated. (C). Bar plot showing DESeq2 normalized count of *Il12b* in TLR/IFN $\gamma$  activated cDC1. (D). RT-qPCR showing relative mRNA expression of TLR response genes in 6h CpG+pIC+IFN $\gamma$  vs 6h CpG+pIC stimulation condition in control cDC1 (n=3). (E). Bar plot showing DESeq2 normalized count of exemplary DC response genes showing antagonistic expression behavior after combined 6h CpG+pIC+IFN $\gamma$  stimulation. (F). RT-qPCR showing relative mRNA expression of exemplary TLR response genes showing no significant difference between 6h CpG+pIC and CpG+pIC+IFN $\gamma$  stimulation conditions in control cDC1 (n=6). (G). Contour plot from flow cytometry analysis depicting the intracellular cytokine expression of IL-12p40/70, IL-10, in control cDC1 before and after 6h TLR/IFN $\gamma$  stimulation. (H). Scatter dot plot and bar-plot representing percent positive cells and MFI respectively for IL-12b (n=4) and IL-10 (n=3).
