# Supplementary material
Source: PubMed Central journal article supplement (PMC11072860)
Supplement: 18_2022_4424_MOESM3_ESM.pdf [file 18_2022_4424_MOESM3_ESM.pdf]

# Supplementary Figure 3

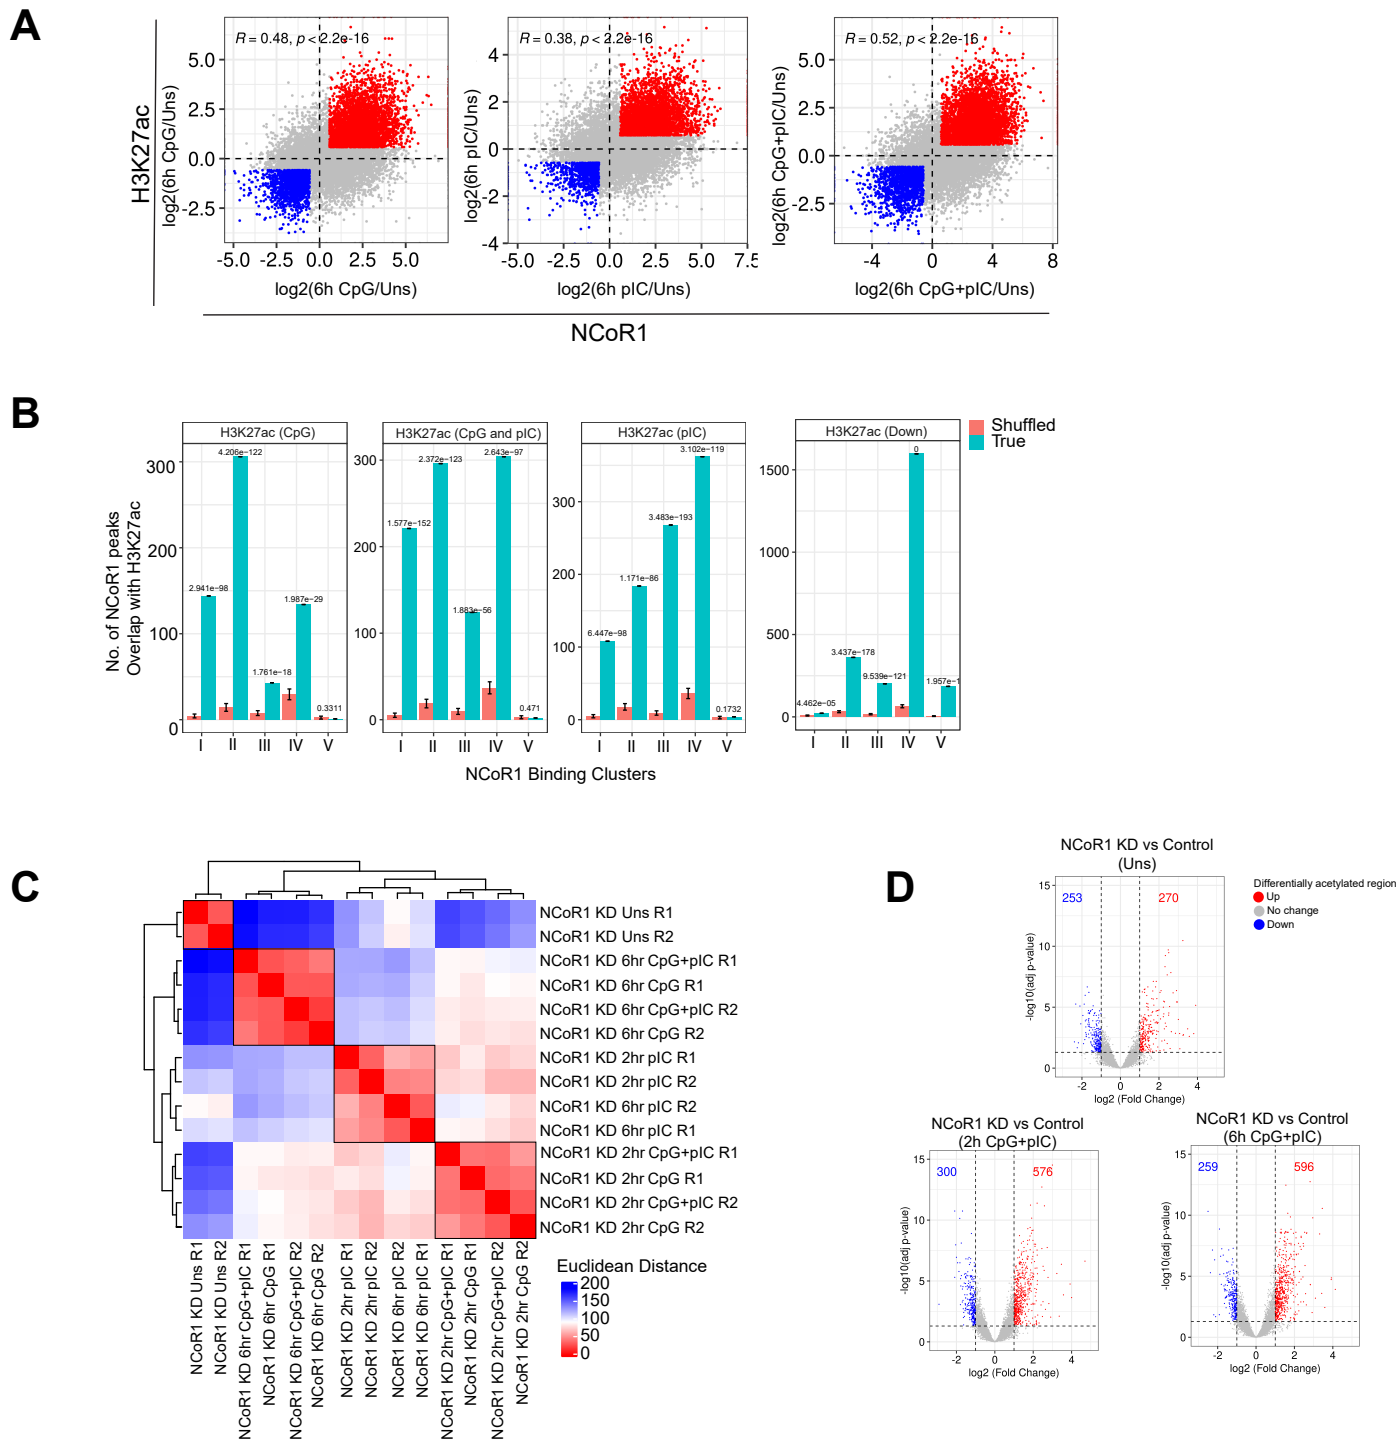

**Figure S3. Overlap of NCoR1 with H3K27ac marked enhancer and effect of enhancer activity in NCoR1 depleted cDC1.**

**(A).** Scatter plot showing correlation of ratio of normalized tag count of NCoR1 binding enrichment in the CpG, pIC and CpG+pIC stimulation compared to unstimulated versus H3K27ac ChIP enrichment in the  $\pm$  500bp to NCoR1 peak center in CpG, pIC and CpG+pIC stimulation condition compared to unstimulated.

**(B).** Bar plot showing number of overlapping genomic regions of NCoR1 binding cluster with enhancer clusters defined based on H3K27ac ChIP-seq data shown in Figure 2C. Significance of overlap was calculated using OLOGRAM program.

**(C).** Heatmap showing hierarchical clustering of NCoR1 KD H3K27ac ChIP-seq samples in unstimulated, 2h, and 6h (CpG, pIC and CpG+pIC) stimulated condition based on euclidean distance.

**(D).** Volcano plot showing total number of differentially acetylated genomic regions in unstimulated, 2h and 6h CpG+pIC stimulated NCoR1 KD cDC1 compared to respective control samples.
